# Supplementary material for: Inflammation resolution circuits are uncoupled in acute sepsis and correlate with clinical severity
Source: JCI journal article supplement (doi:10.1172/jci.insight.148866), 2021-06-24
Supplement: sd1 [file 1]

You are being redirected.
