# Supplementary material for: Inflammation resolution circuits are uncoupled in acute sepsis and correlate with clinical severity
Source: JCI journal article supplement (doi:10.1172/jci.insight.148866), 2021-06-24
Supplement: sd1 [file 1]

# **Inflammation resolution circuits are uncoupled in acute sepsis and correlate with clinical severity**

Bakr Jundi<sup>1</sup>, Do-Hyun Lee<sup>2</sup>, Hyungkook Jeon<sup>2</sup>, Melody G. Duvall<sup>1</sup>, Julie Nijmeh<sup>1</sup>, Raja-Elie E. Abdalnour<sup>1</sup>, Mayra Pinilla-Vera <sup>1</sup>, Rebecca M. Baron<sup>1</sup>, Jongyoon Han<sup>2</sup>, Joel Voldman<sup>2</sup>, Bruce D. Levy<sup>1\*</sup>

ONLINE DATA SUPPLEMENT

**Supplementary Figure 1. Flow cytometry gating strategy for identification of PMN and monocyte subsets isolated from peripheral blood.** From 50  $\mu$ L of collected peripheral blood, leukocytes were isolated using the closed-loop operation of spiral microfluidics system (see methods). On the flow cytometry contour plots, PMNs were identified by FSC<sup>+</sup>SSC<sup>+</sup>CD45<sup>+</sup>CD66b<sup>+</sup> and its subsets were identified by CD16 and CD66b surface expression. Monocytes were identified by FSC<sup>+</sup>SSC<sup>-</sup>CD45<sup>+</sup>CD66b<sup>-</sup> and its subsets were identified by CD16 and CD14 surface expression. CM, classical monocytes, IM, intermediate monocytes, NCM, non-classical monocytes.

**Supplementary Figure 2. DRV1, ALX and DRV2 receptor expression during hospitalization stay and PMN responses to exogenous RvD1 and RvD2.** From 50  $\mu$ L of collected peripheral blood, leukocytes were isolated using the closed-loop operation of spiral microfluidics system (see methods). **(A)** The mean fluorescent intensity (MFI) of surface expression of DRV1, ALX and DRV2 on all PMN subsets was determined in sepsis patients at day 0 and during their 7-day hospitalization. **(B)** CD16<sup>bright</sup> PMNs from healthy subjects were exposed to a pHrodo-labelled *E. coli* bioparticles for 15 min at 37°C and 4°C to determine the gating strategy. **(C)** The frequency of pHrodo<sup>+</sup> CD16<sup>bright</sup> PMNs after exposure to vehicle (<0.01 EtOH, circle), RvD1 (100 nM, square), or RvD2 (100 nM, triangle) in sepsis at day 0 and during their 7-day hospitalization. **(D)** The absolute increase of pHrodo<sup>+</sup> in all subsets of PMN with exogenous RvD1 and RvD2 as measured by SPM sepsis – sepsis vehicle. Values are expressed as the mean  $\pm$  s.e.m. n = 3 healthy subjects, n = 18 patients with sepsis.

**Supplementary Figure 3. Effect of RvD1 and RvD2 on response of PMN from healthy and sepsis patients to PMA stimulation.** PMN were isolated from 100  $\mu$ L of peripheral blood using the magnetic activated cell sorting (MACS) kit (see methods), then first incubated with vehicle ( $<0.01$  v/v EtOH), RvD1 (100 nM), or RvD2 (100 nM) for 15 minutes, followed by PMA (red) or vehicle (black) stimulation for 30 minutes. Their IDPs were measured at 7 MHz frequency. **(A)** Representative histogram plots of IDP distribution and **(B)** measurement of median IDP in response to RvD1 and RvD2 in PMA-stimulated (red) and non-stimulated (black) PMNs isolated from healthy subjects. The dashed lines in A represent the median IDP. **(C)** Box and whisker plots (median, 25<sup>th</sup> and 75<sup>th</sup> percentiles) of the  $\Delta_{\text{medIDP}}$  (calculated by Median IDP (non-stimulated) – Median IDP (stimulated)) in sepsis and health. RvD1 and RvD2 dose-response curves of median IDP of non-stimulated PMN **(D)** and  $\Delta_{\text{medIDP}}$  **(E)** from healthy subjects. n=3-4 healthy subjects and n=4 sepsis patients.

**Supplementary Figure 4. Response of various monocyte subsets in sepsis to RvD1 and RvD2.**

From 50  $\mu$ L of peripheral blood, monocytes were isolated using the closed-loop operation of spiral microfluidics system (see methods). **(A)** Level of surface receptor expression of DRV1, ALX and DRV2 expressed as MFI on all monocyte subsets (CM, IM, NCM) were determined in sepsis patients at day 0 and throughout their hospitalization. **(B)** Frequency of pHrodo<sup>+</sup> classical monocytes in sepsis (crimson) and health (dark gray) after incubation with exogenous RvD1 (100 nM), RvD2 (100 nM), or vehicle ( $<0.01\%$  v/v EtOH) for 15 min at 37°C. **(C)** Absolute increase in frequency of pHrodo<sup>+</sup> of all monocyte subsets (CM, IM, NCM) in sepsis patients. **(D)** Dose-response curve of the frequency of pHrodo<sup>+</sup> classical monocytes to varying concentrations of RvD1 (circle, crimson), RvD2 (square, crimson), or vehicle (mean value, dashed gray line).

\*P<0.05 intermediate vs. non-classical monocyte in sepsis patients by paired, two-tailed t-test. Values are expressed as the mean +/- s.e.m. n = 17 patients with sepsis.

**Supplementary Figure 5. Differential expression of DRV1, ALX and DRV2 receptors and functional responses in sepsis are counter regulated by RvD1 and RvD2.** Two-dimensional score and loading plots from multivariate principal component analysis (**A & C**) and mean Z-score (**B & D**) were performed for DRV1, ALX, and DRV2 receptor expression on leukocytes, and leukocyte activation and function as indicated by  $\Delta_{\text{medIDP}}$  and percentage of pHrodo<sup>+</sup> CD16<sup>bright</sup> PMN, and pHrodo<sup>+</sup> classical monocytes (CM). Healthy subjects are indicated in red, sepsis patients treated with vehicle control are in green, addition of RvD1 and RvD2 is indicated in blue and aquamarine, respectively. (**A & B**) PCA and mean Z-score for SPM receptor expression were from n=4 healthy subjects and n = 10 sepsis patients. (**C & D**) PCA and mean Z-score for leukocyte activation and function parameters were from n=4 healthy subjects and n = 4 sepsis patients; as complete functional data were only available for these 4 patients with sepsis. The mean Z-score was derived from individual variable Z-scores in a given subject. See Fig. 4 for PCA analysis for subjects with complete data set of receptors, function, and activation. Values are expressed as the mean +/- s.e.m. \*P<0.05 health vs. sepsis by unpaired, two-tailed t-test. §P<0.05 Kruskal-Wallis test, followed by Dunn's test for multiple comparisons.

**Supplementary Figure 6. Correlation between absolute increase of frequency of pHrodo<sup>+</sup> CD16<sup>bright</sup> PMN with exogenous RvD1 and sepsis clinical severity.** (**A**) The relationship between clinical severity indicators (SOFA, APACHE II, status of mechanical ventilation, and mortality outcome) and absolute increase of pHrodo<sup>+</sup> CD16<sup>bright</sup> PMN with exogenous RvD1. n =



11 sepsis patients. The Pearson correlation  $r$  value and significance are noted, and regression lines are shown.

**Supplementary Figure 7. Correlation between absolute increase of frequency of pHrodo<sup>+</sup> CD16<sup>bright</sup> PMN with exogenous RvD2 and sepsis clinical severity.** (A) The relationship between clinical severity indicators (SOFA, APACHE II, status of mechanical ventilation, and mortality outcome) and absolute increase of pHrodo<sup>+</sup> CD16<sup>bright</sup> PMN with exogenous RvD2.  $n = 10$  patients with sepsis. The Pearson correlation  $r$  value and significance are noted, and regression lines are shown.

Supplemental Figure 1

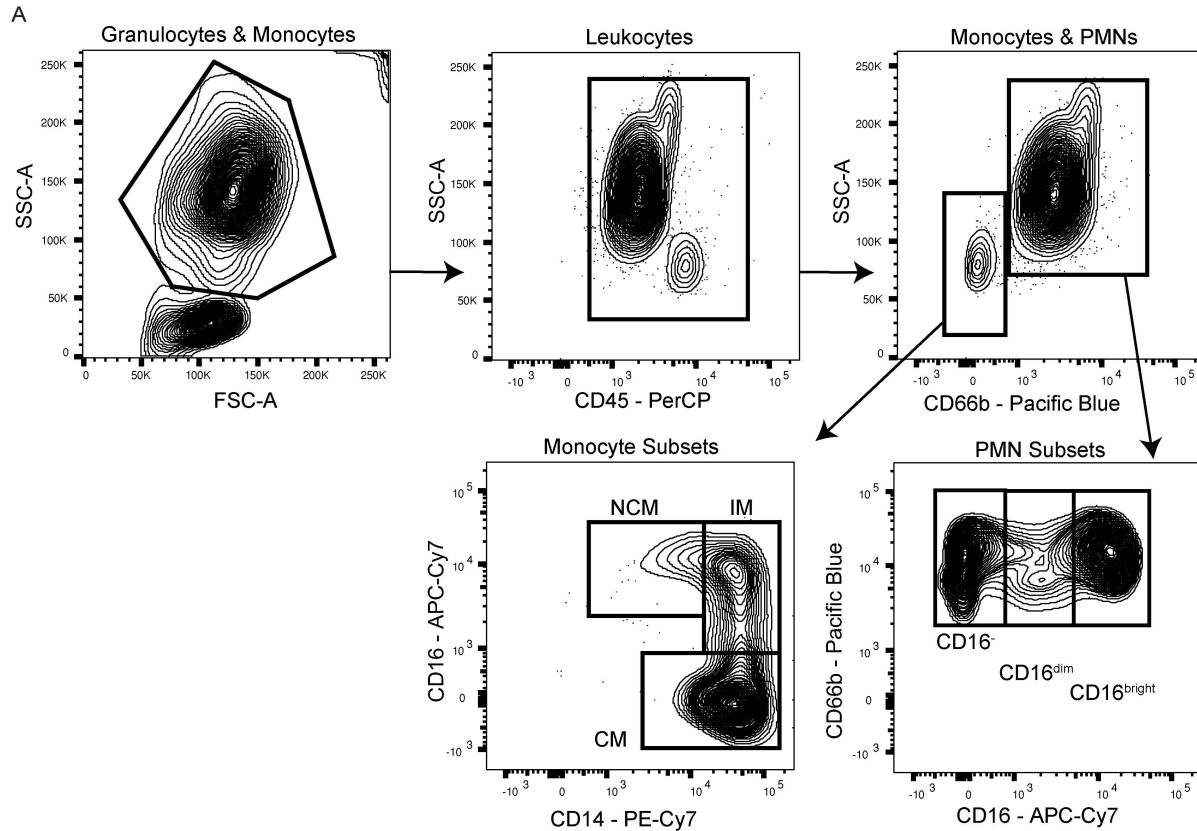

**Supplemental Figure 1. Flow cytometry gating strategy for identification of PMN and monocyte subsets isolated from peripheral blood.** From 50  $\mu$ L of collected peripheral blood, leukocytes were isolated using the closed-loop operation of spiral microfluidics system (see methods). **(A)** On the flow cytometry contour plots, PMNs were identified by FSC<sup>+</sup>SSC<sup>+</sup>CD45<sup>+</sup>CD66b<sup>+</sup> and its subsets were identified by CD16 and CD66b surface expression. Monocytes were identified by FSC<sup>+</sup>SSC<sup>+</sup>CD45<sup>+</sup>CD66b<sup>-</sup> and its subsets were identified by CD16 and CD14 surface expression. CM, classical monocytes, IM, intermediate monocytes, NCM, non-classical monocytes.

Supplemental Figure 2

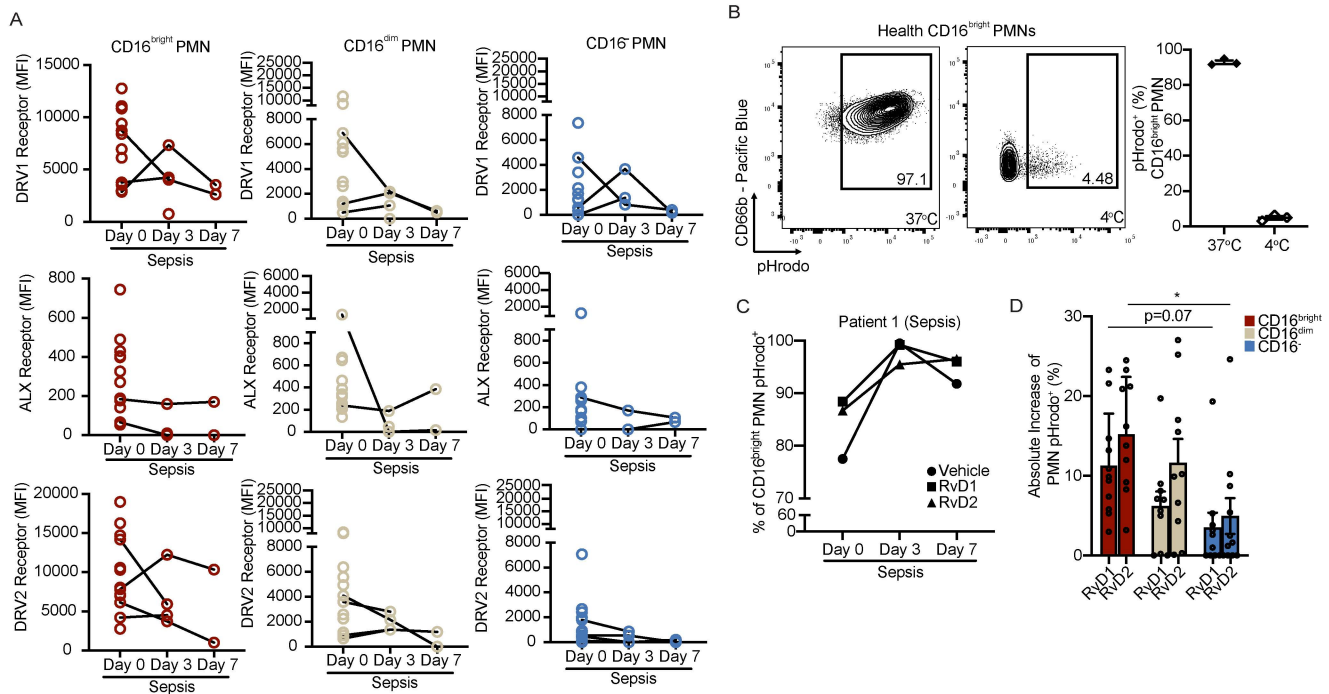

**Supplemental Figure 2. DRV1, ALX and DRV2 receptor expression during hospitalization stay and PMN responses to exogenous RvD1 and RvD2.** From 50  $\mu$ L of collected peripheral blood, leukocytes were isolated using the closed-loop operation of spiral microfluidics system (see methods). **(A)** The mean fluorescent intensity (MFI) of surface expression of DRV1 ( $n=12$ ), ALX ( $n=13$ ) and DRV2 ( $n=13$ ) on all PMN subsets was determined in sepsis patients at day 0 and during their 7-day hospitalization. **(B)** CD16<sup>bright</sup> PMNs from healthy subjects ( $n=3$ ) were exposed to a pHrodo-labelled *E. coli* bioparticles for 15 min at 37°C and 4°C to determine the gating strategy. **(C)** The frequency of pHrodo<sup>+</sup> CD16<sup>bright</sup> PMNs after exposure to vehicle ( $<0.01$  EtOH, circle), RvD1 (100 nM, square), or RvD2 (100 nM, triangle) in sepsis at day 0 and during their 7-day hospitalization. **(D)** The absolute increase of pHrodo<sup>+</sup> in all subsets of PMN with exogenous RvD1 ( $n=11$ ) and RvD2 ( $n=10$ ) as measured by SPM sepsis – sepsis vehicle. Values are expressed as the mean  $\pm$  s.e.m. \* $P<0.05$  for absolute increase of PMN subsets pHrodo<sup>+</sup> of RvD2 by one-way analysis of variance (ANOVA).

Supplemental Figure 3

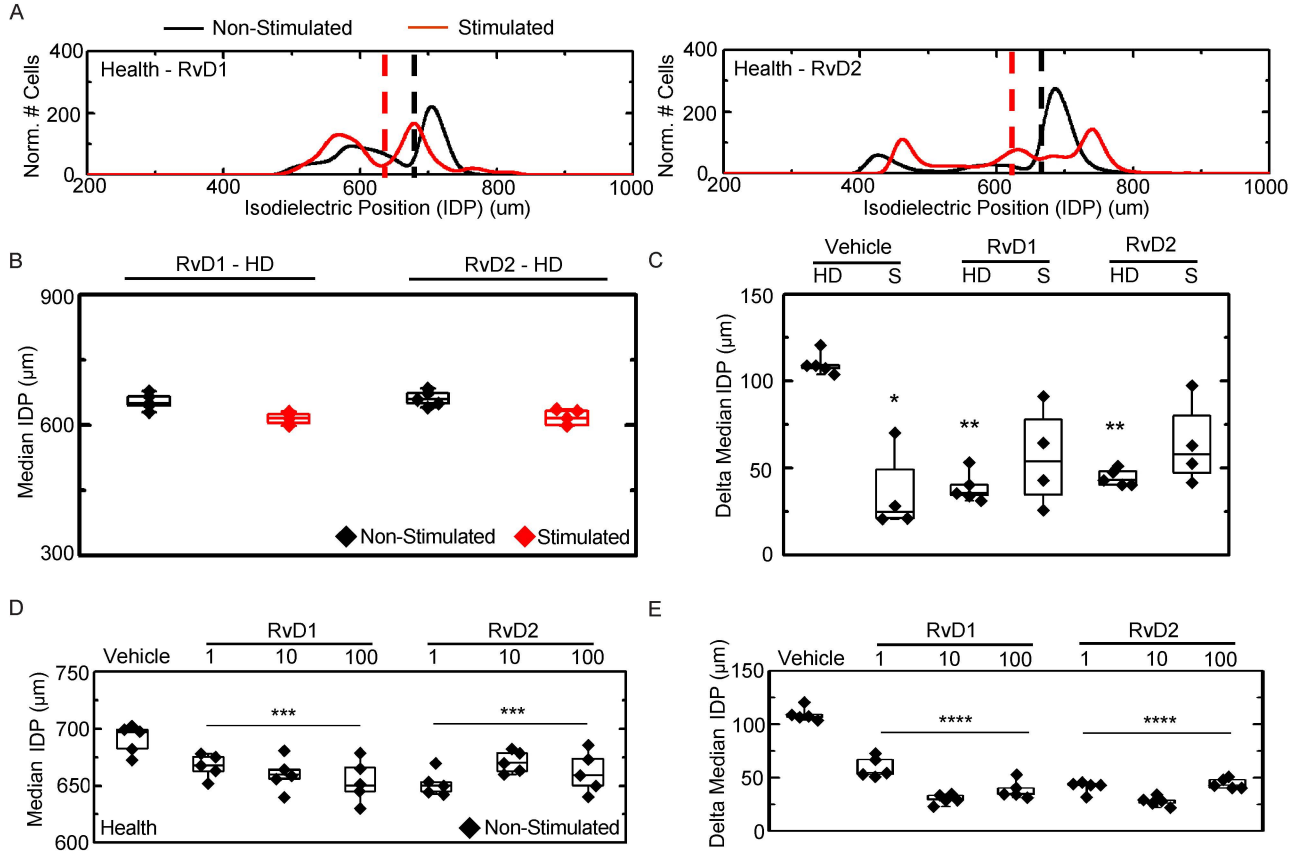

**Supplemental Figure 3. Effect of RvD1 and RvD2 on response of PMN from healthy and sepsis patients to PMA stimulation.** PMN were isolated from 100  $\mu$ L of peripheral blood using the magnetic activated cell sorting (MACS) kit (see methods), then first incubated with vehicle (<0.01 v/v EtOH), RvD1 (100 nM), or RvD2 (100 nM) for 15 minutes, followed by PMA (red) or vehicle (black) stimulation for 30 minutes. Their IDPs were measured at 7 MHz frequency. **(A)** Representative histogram plots of IDP distribution and **(B)** measurement of median IDP in response to RvD1 and RvD2 in PMA-stimulated (red) and non-stimulated (black) PMNs isolated from healthy subjects. The dashed lines in A represent the median IDP. **(C)** Box and whisker plots (median, 25th and 75th percentiles) of the  $\Delta_{med}$  IDP (calculated by Median IDP (non-stimulated) – Median IDP (stimulated)) in sepsis and health. RvD1 and RvD2 dose-response curves of median IDP of non-stimulated PMN **(D)** and  $\Delta_{med}$  IDP **(E)** from healthy subjects. \* $P$ <0.05 for  $\Delta_{med}$  IDP of vehicle exposed PMN in health vs sepsis by unpaired, two-tailed t-test. \*\* $P$ <0.05 for  $\Delta_{med}$  IDP of PMNs in health exposed to RvD1 & RvD2 vs vehicle by paired, two-tailed t-test. \*\*\* $P$ <0.05 for concentration-response curve of the median IDP of non-stimulated PMN from healthy individuals with exogenous vehicle, RvD1, and RvD2 by one-way ANOVA. \*\*\*\* $P$ <0.05 for concentration-response curve of the  $\Delta_{med}$  IDP of non-stimulated PMN from healthy individuals with exogenous vehicle, RvD1, and RvD2 by one-way ANOVA.  $n$ =5 healthy subjects and  $n$ =4 sepsis patients.

Supplemental Figure 4

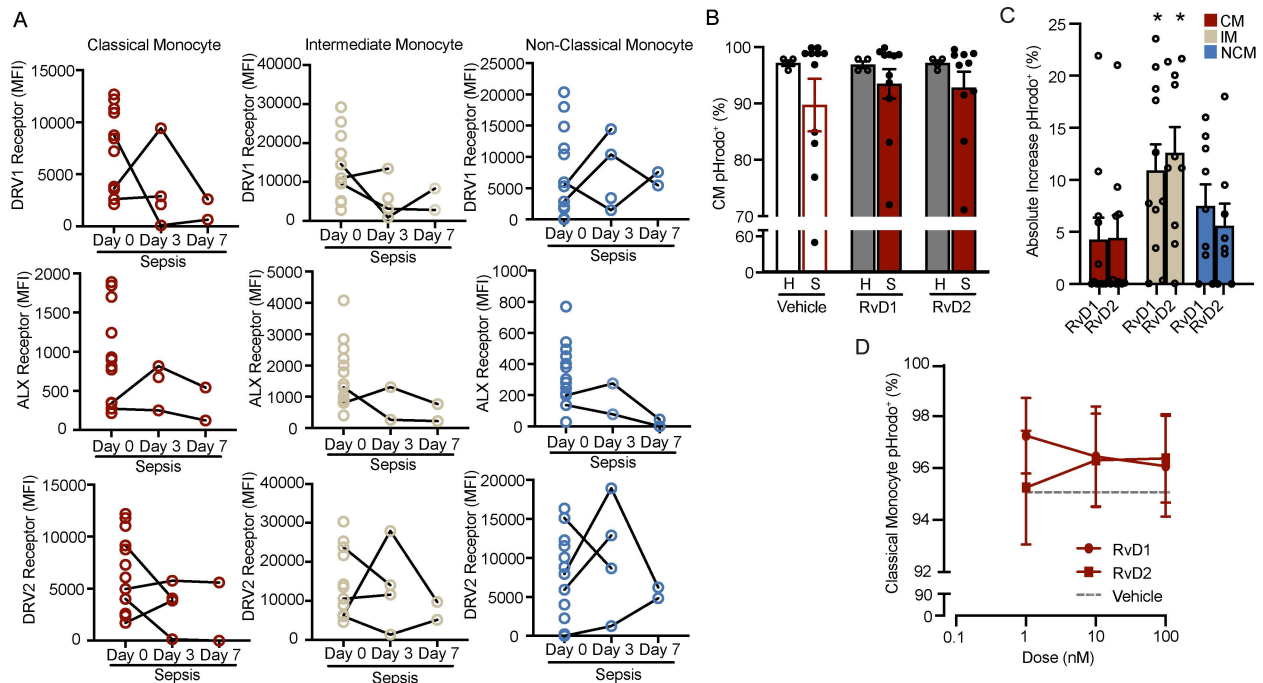

**Supplemental Figure 4. Response of various monocyte subsets in sepsis to RvD1 and RvD2.** From 50  $\mu$ L of peripheral blood, monocytes were isolated using the closed-loop operation of spiral microfluidics system (see methods). **(A)** Level of surface receptor expression of DRV1 (n=12), ALX (n=13) and DRV2 (n=13) expressed as MFI on all monocyte subsets (CM, IM, NCM) were determined in sepsis patients at day 0 and throughout their hospitalization. **(B)** Frequency of pHrodo<sup>+</sup> classical monocytes in sepsis (crimson, n=11) and health (dark gray, n=4) after incubation with exogenous RvD1 (100 nM), RvD2 (100 nM), or vehicle (<0.01% v/v EtOH) for 15 min at 37°C. **(C)** Absolute increase in frequency of pHrodo<sup>+</sup> of all monocyte subsets (CM, IM, NCM) in sepsis patients (n=10-11). **(D)** Dose-response curve of the frequency of pHrodo<sup>+</sup> classical monocytes to varying concentrations of RvD1 (circle, crimson), RvD2 (square, crimson), or vehicle (mean value, dashed gray line, n=6). \*P<0.05 intermediate vs. non-classical monocyte in sepsis patients by paired, two-tailed t-test. Values are expressed as the mean  $\pm$  s.e.m.

Supplemental Figure 5

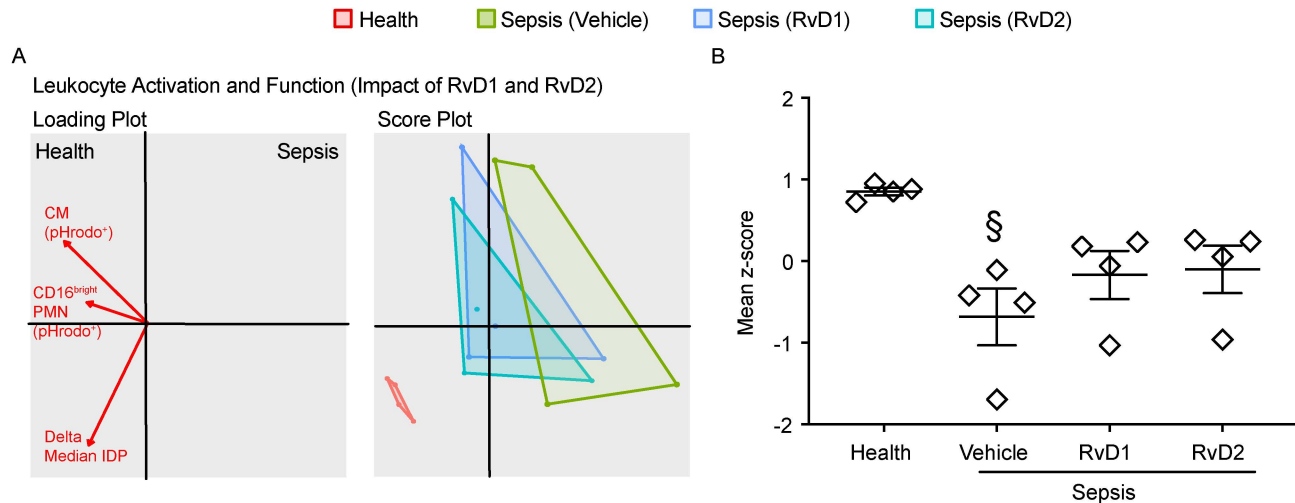

**Supplemental Figure 5. Differential expression of DRV1, ALX and DRV2 receptors and functional responses in sepsis are counter regulated by RvD1 and RvD2.** Two-dimensional score and loading plots from multivariate principal component analysis **(A)** and mean Z-score **(B)** were performed for leukocyte activation and function as indicated by  $\Delta_{\text{med}}$ IDP and percentage of pHrodo<sup>+</sup> CD16<sup>bright</sup> PMN, and pHrodo<sup>+</sup> classical monocytes (CM). Healthy subjects are indicated in red, sepsis patients treated with vehicle control are in green, addition of RvD1 and RvD2 is indicated in blue and aquamarine, respectively. **(A & B)** PCA and mean Z-score for leukocyte activation and function parameters were from n=4 healthy subjects and n = 4 sepsis patients; as complete functional data were only available for these 4 patients with sepsis. The mean Z-score was derived from individual variable Z-scores in a given subject. See Figure. 4 for PCA analysis for subjects with complete data set of receptors, function, and activation. Values are expressed as the mean +/- s.e.m. P<0.05 Kruskal-Wallis test, followed by Dunn's test for multiple comparisons.



Supplemental Figure 6

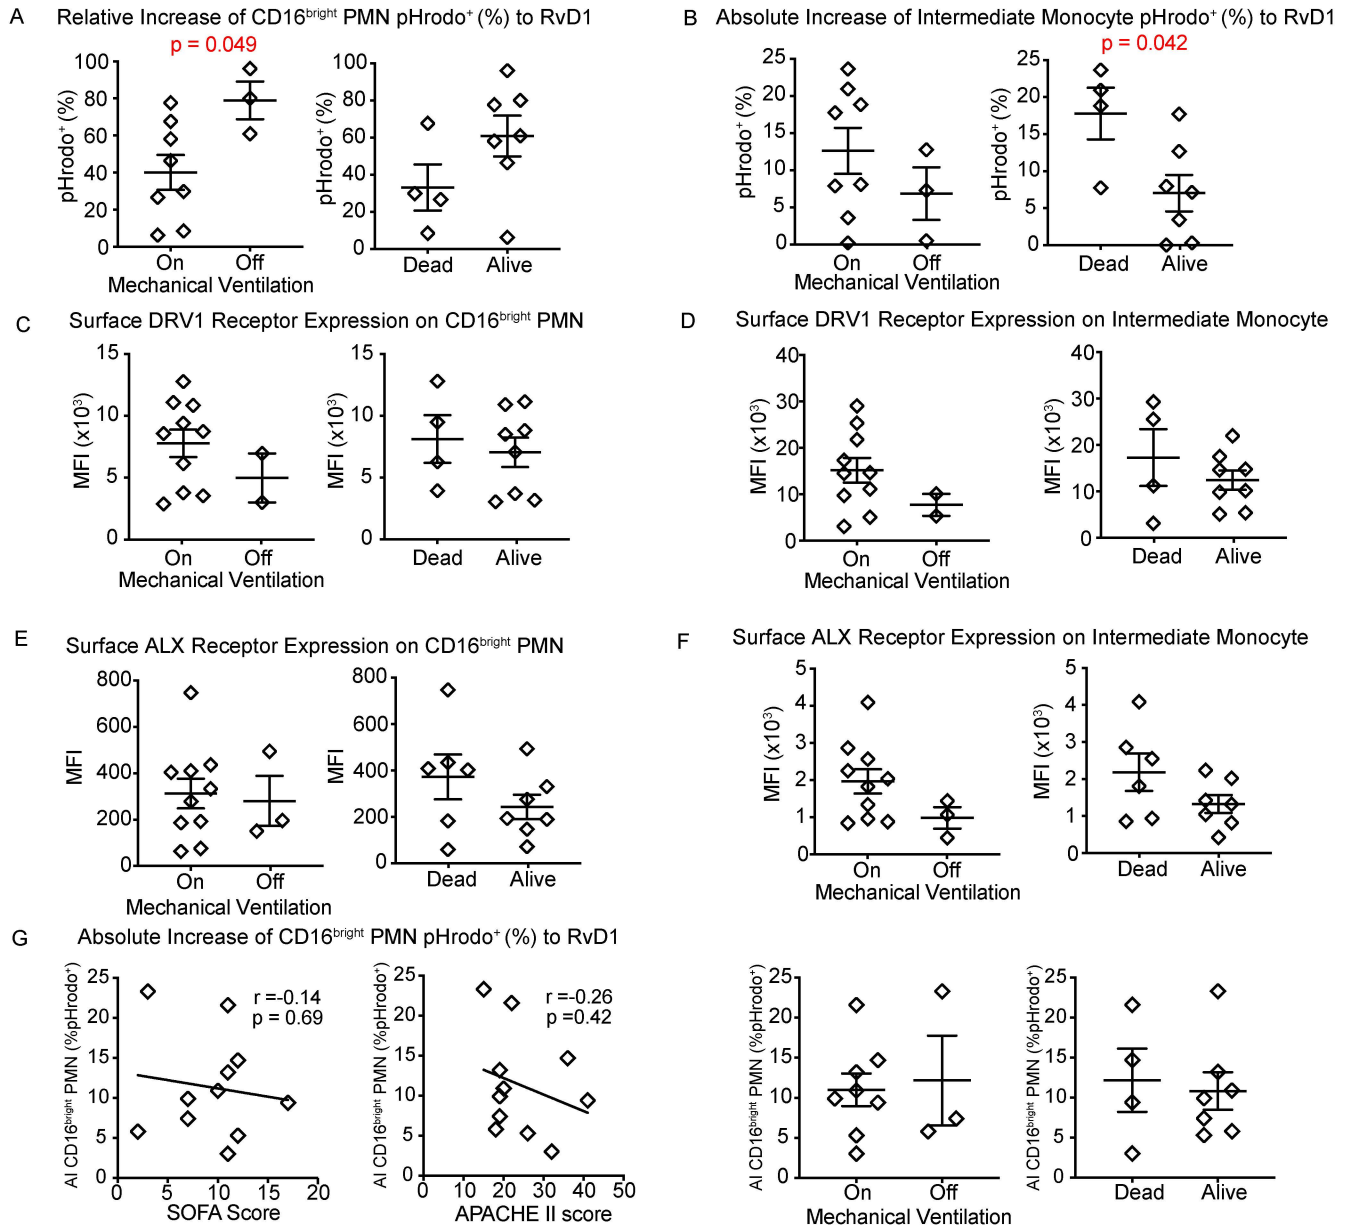

**Supplemental Figure 6. Relationship between leukocyte responses to RvD1 and sepsis clinical severity.**

The correlation between severity indicators (status of mechanical ventilation and mortality outcome) and **(A)** relative increase of CD16<sup>bright</sup> PMN pHrodo<sup>+</sup> to RvD1 ( $n=11$ ), **(B)** absolute increase of intermediate monocyte pHrodo<sup>+</sup> to RvD1 ( $n=11$ ), and surface expression of DRV1 **(C,D)** ( $n=12$ ) and ALX **(E,F)** ( $n=13$ ) on CD16<sup>bright</sup> PMN and intermediate monocyte were determined. The relationship between the **(G)** absolute increase of CD16<sup>bright</sup> PMN pHrodo<sup>+</sup> to RvD1 ( $n=11$ ) and clinical severity indicators (SOFA, APACHE II, status of mechanical ventilation, and mortality outcome) was determined. The Pearson correlation  $r$  value and significance are noted, and regression lines are shown. Values are expressed as the mean  $\pm$  s.e.m.

Supplemental Figure 7

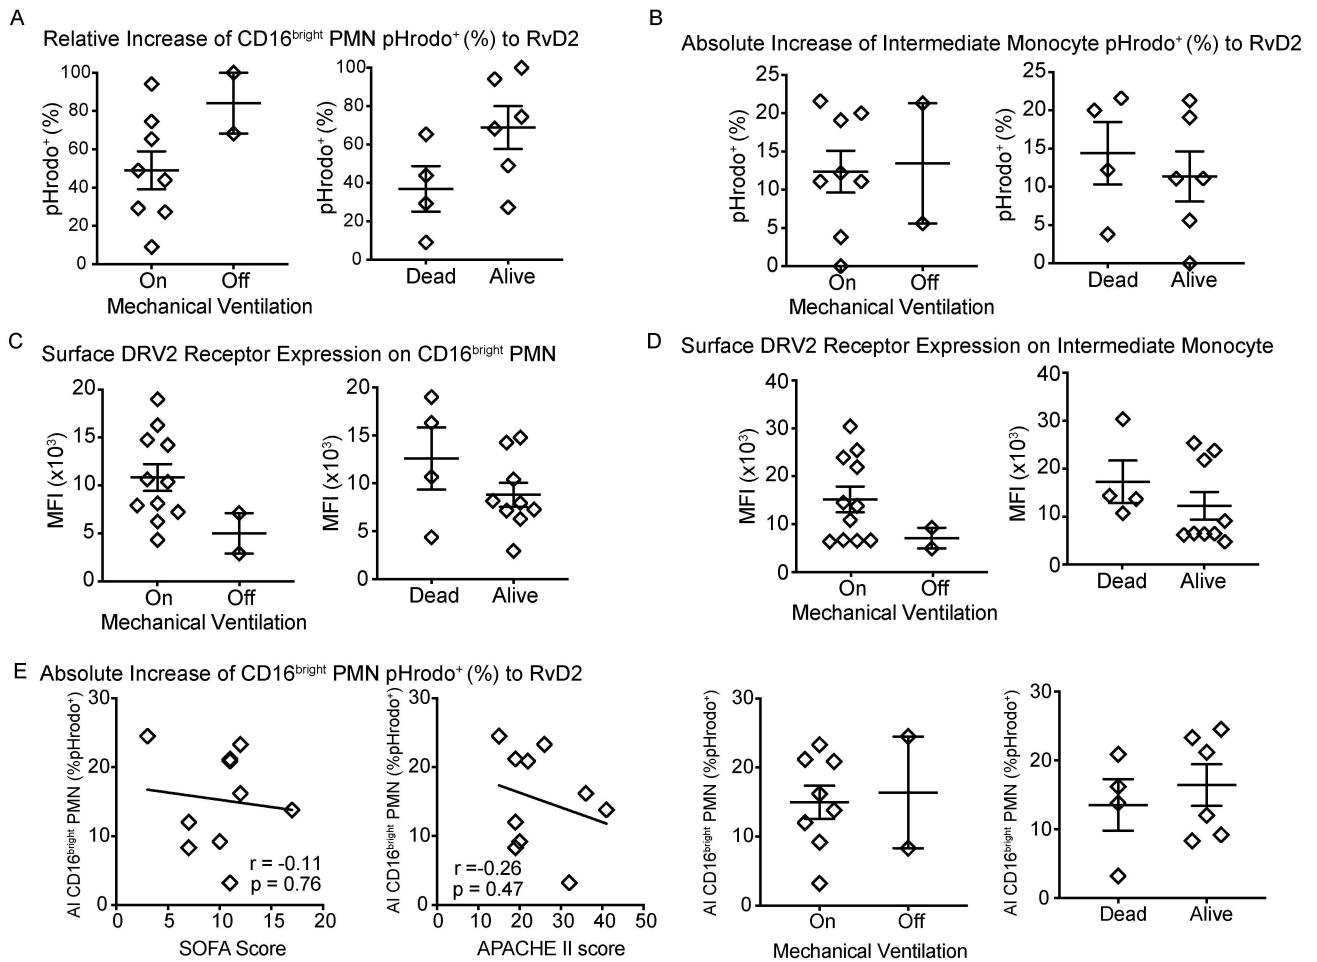

**Supplemental Figure 7. Relationship between leukocyte responses to RvD2 and sepsis clinical severity.** The correlation between severity indicators (status of mechanical ventilation and mortality outcome) and **(A)** relative increase of CD16<sup>bright</sup> PMN pHrodo<sup>+</sup> to RvD2 (n=10), **(B)** absolute increase of intermediate monocyte pHrodo<sup>+</sup> to RvD2 (n=10), and surface expression of DRV2 **(C,D)** (n=12) on CD16<sup>bright</sup> PMN and intermediate monocyte were determined. The relationship between the **(E)** absolute increase of CD16<sup>bright</sup> PMN pHrodo<sup>+</sup> to RvD2 (n=11) and clinical severity indicators (SOFA, APACHE II, status of mechanical ventilation, and mortality outcome) was determined. The Pearson correlation r value and significance are noted, and regression lines are shown. Values are expressed as the mean +/- s.e.m.
